# Supplementary material for: Hydrogen Sulfide Promotes Bone Homeostasis by Balancing Inflammatory Cytokine Signaling in CBS-Deficient Mice through an Epigenetic Mechanism
Source: PubMed Central journal article supplement (PMC6189133; doi:10.1038/s41598-018-33149-9), 2018-10-15
Supplement: 41598_2018_33149_MOESM1_ESM.pdf [file 41598_2018_33149_MOESM1_ESM.pdf]

## **Supplementary information**

(Full length blots/gels for the main figures in the paper)

### **Hydrogen sulfide maintains bone homeostasis by balancing inflammatory cytokine signaling in CBS-deficient mice through an epigenetic mechanism**

Jyotirmaya Behera<sup>1</sup>, Kimberly E. Kelly<sup>1</sup>, Michael J. Voor<sup>2, 3</sup>, Naira Metreveli<sup>1</sup>, Suresh C. Tyagi<sup>1</sup>, Neetu Tyagi<sup>1\*</sup>

<sup>1</sup>*Bone Biology Laboratory, Department of Physiology, School of Medicine, University of Louisville, Louisville, KY 40202*

<sup>2</sup>*Department of Orthopaedic Surgery, School of Medicine, University of Louisville, Louisville, KY 40202 USA*

<sup>3</sup>*Department of Bioengineering, Speed School of Engineering, University of Louisville, Louisville, KY 40292 USA*

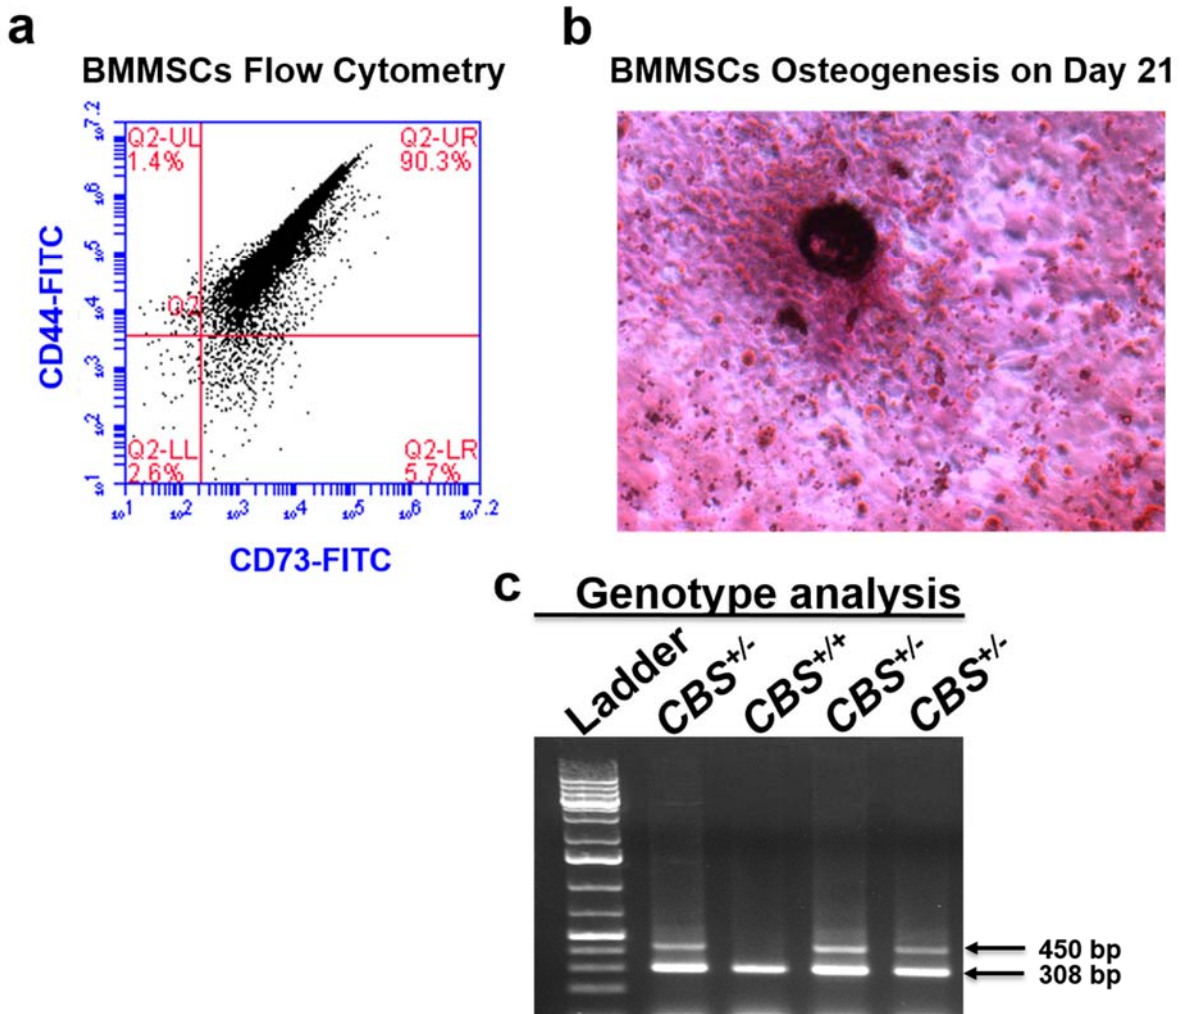

## Supplementary Figure 1

**Supplementary Fig. S1:** Characterization of BMMSCs. (A) Flow cytometry analysis of BMMSCs assessing the presence of CD44 and CD73. 90.3% of BMMSCs were stained positive for both CD44 and CD73. (B) To evaluate BMMSCs differentiation and mineralization, BMMSCs were plated at a concentration of  $3.2 \times 10^2$ /well and were grown for 21 days in osteogenic medium. Mineralization capacity was evaluated by Alizarin red staining. (C) Representative genotype image of CBS mice done with specific sets of primers. Heterozygote CBS<sup>+/-</sup> mice produced two bands of 450 and 308 bp; CBS<sup>+/+</sup> mice produced a single band of 308 bp. Experiments were repeated three times.

**Full-length blots for Figure 1**

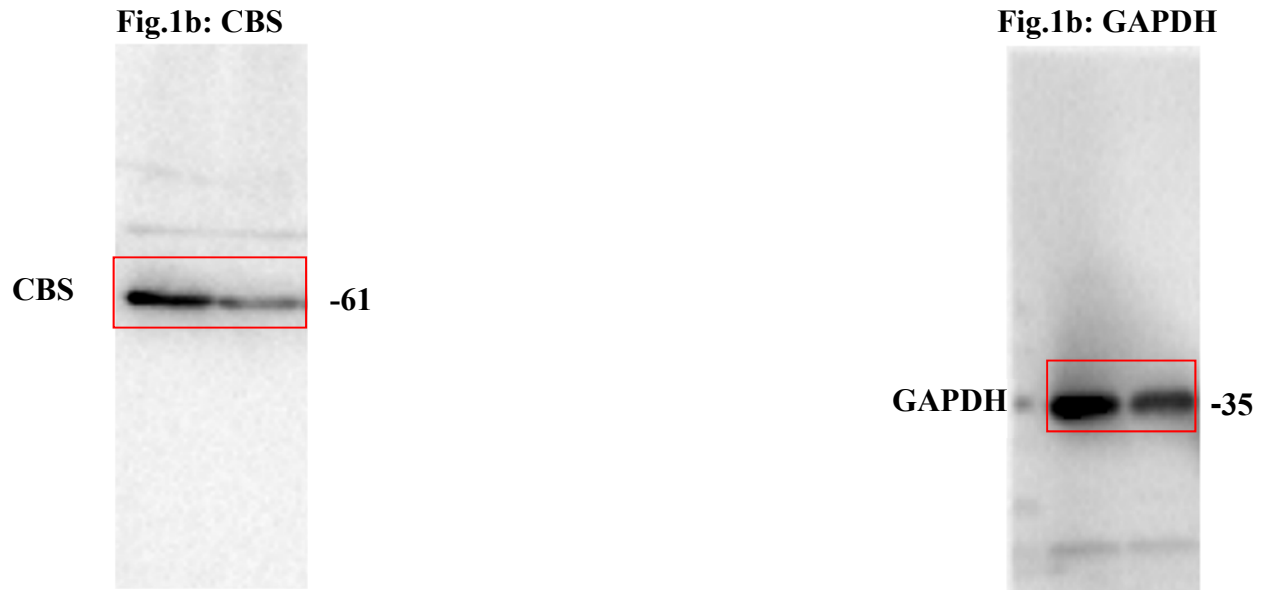

**Supplementary Fig. S2:** Uncropped gels/blots for main Fig.1b. Boxed regions are used in the main figures. For some data, transferred membranes were horizontally cut for applying multiple antibodies. Lanes for unrelated samples are deleted. Lanes from left to right in red box: WT, *CBS*<sup>+/-</sup>

**Full-length blots for Figure 2**

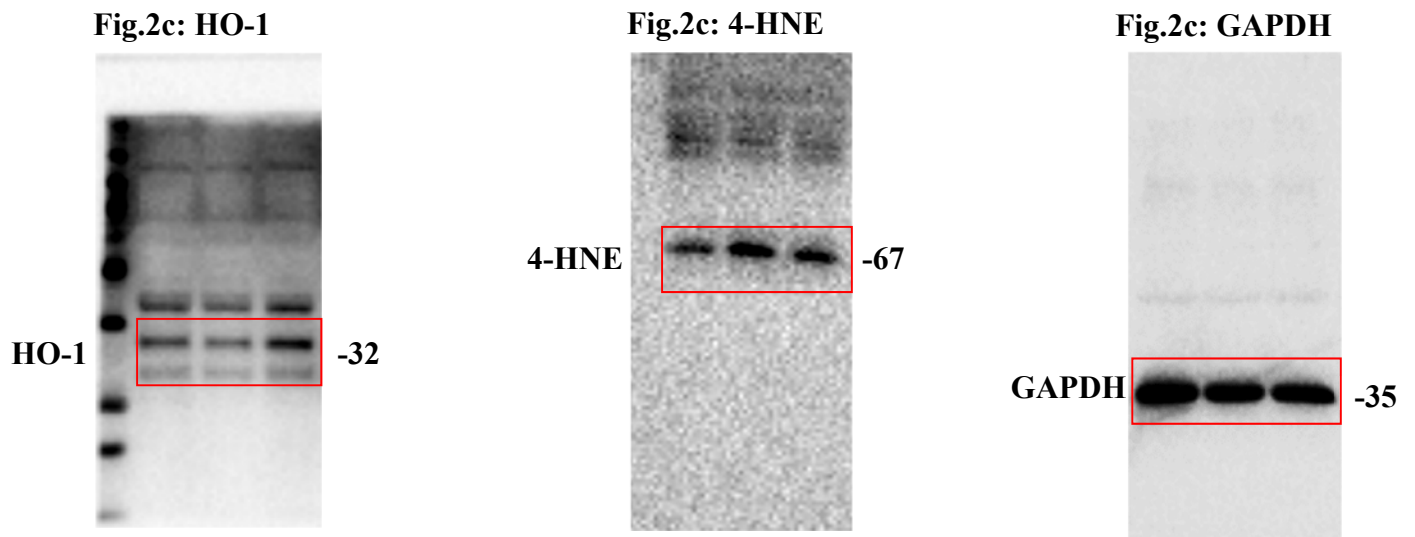

**Supplementary Fig. S3:** Uncropped gels/blots for main Fig.2c. Boxed regions are used in the main figures. For some data, transferred membranes were horizontally cut for applying multiple antibodies. Lanes for unrelated samples are deleted. Lanes from left to right in red box: WT, *CBS*<sup>+/-</sup>, *CBS*<sup>+/-</sup>+NaHS.

**Full-length blots for Figure 3**

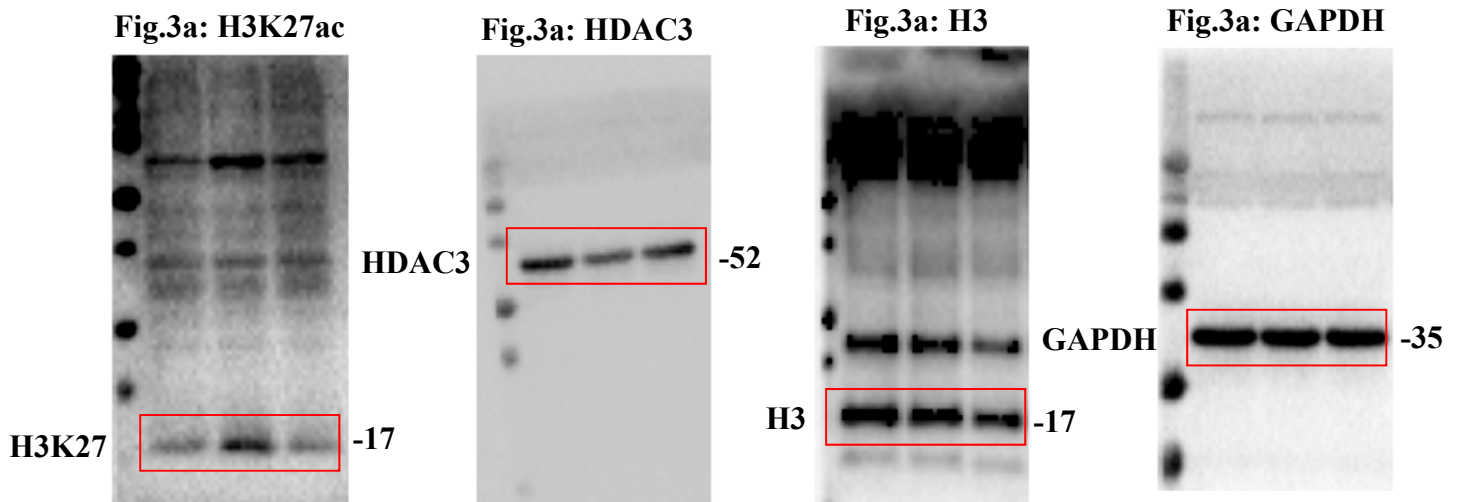

**Supplementary Fig. S4:** Uncropped gels/blots for main Fig.3a. Boxed regions are used in the main figures. For some data, transferred membranes were horizontally cut for applying multiple antibodies. Lanes for unrelated samples are deleted. Lanes from left to right in red box: WT, *CBS*<sup>+/-</sup>, *CBS*<sup>+/-</sup>+NaHS.

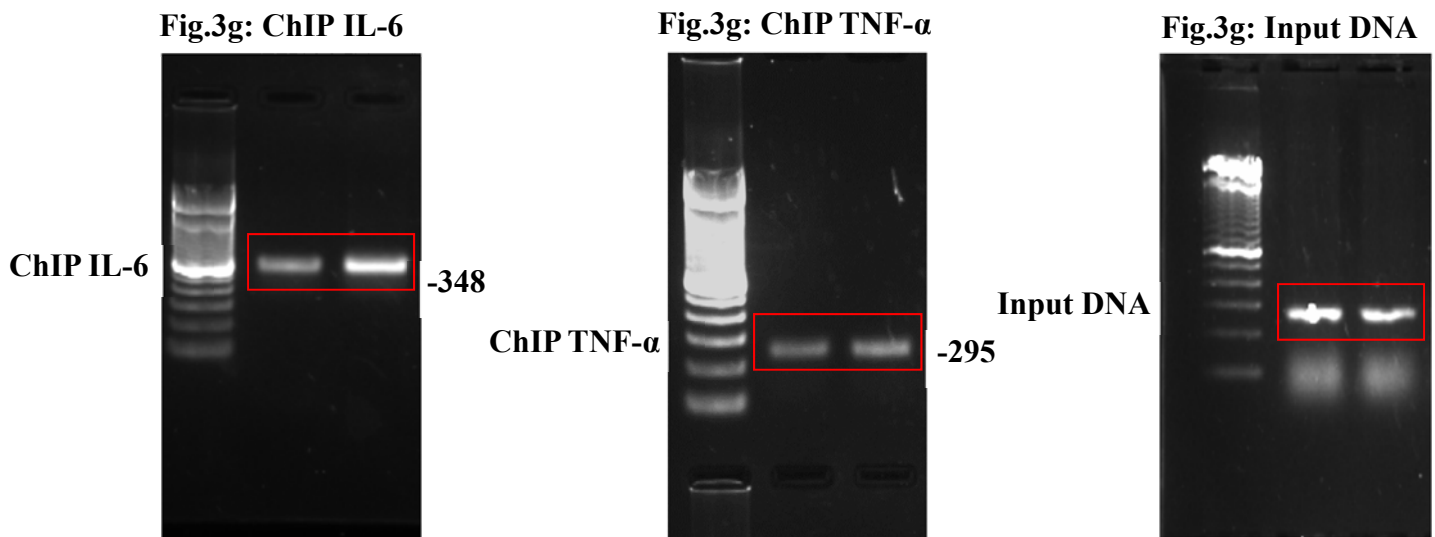

**Supplementary Fig. S5:** Uncropped gels/blots for main Fig.3g. Boxed regions are used in the main figures. For some data, transferred membranes were horizontally cut for applying multiple antibodies. Lanes for unrelated samples are deleted. Lanes from left to right in red box: WT, *CBS*<sup>+/-</sup>, *CBS*<sup>+/-</sup>+NaHS.

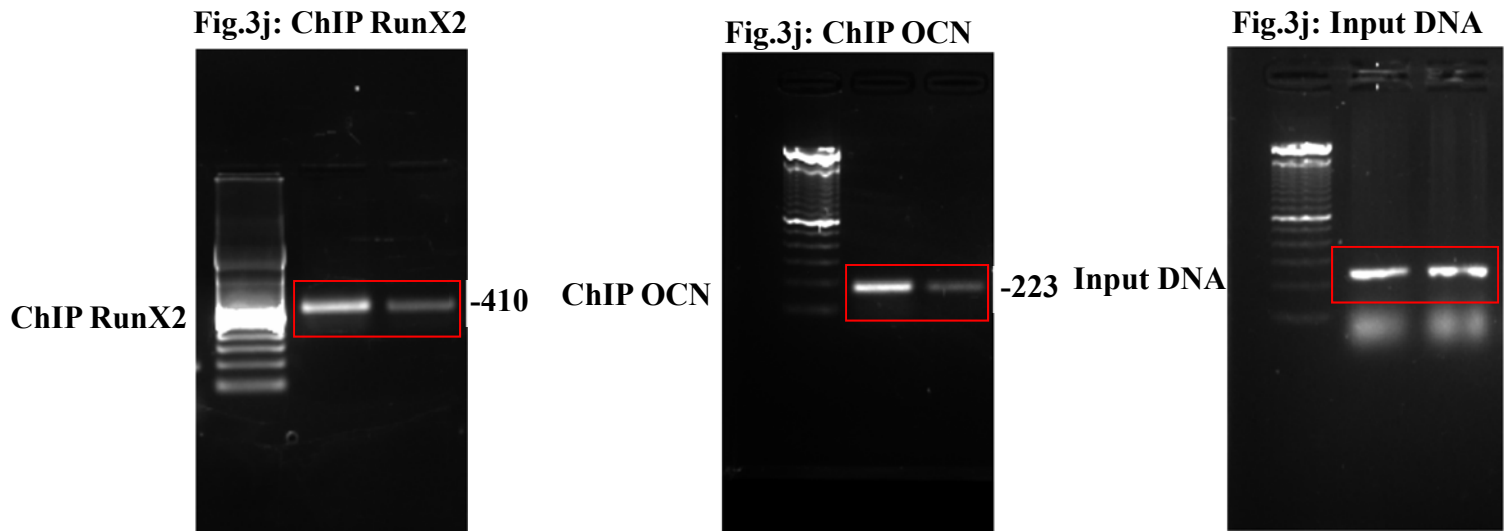

**Supplementary Fig. S6:** Uncropped gels/blots for main Fig.3j. Boxed regions are used in the main figures. For some data, transferred membranes were horizontally cut for applying multiple antibodies. Lanes for unrelated samples are deleted. Lanes from left to right in red box: WT, *CBS*<sup>+/-</sup>, *CBS*<sup>+/-</sup>+NaHS.

**Full-length blots for Figure 4**

**Fig.4a: NF-KbP65**

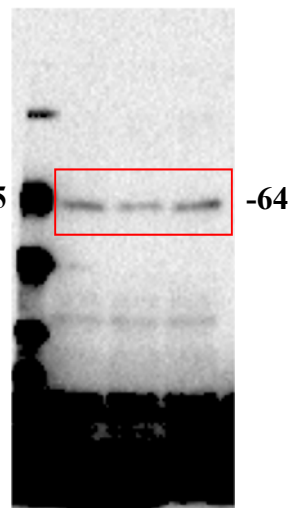

**Fig.4a: NF-KbP65 (Ac-K310)**

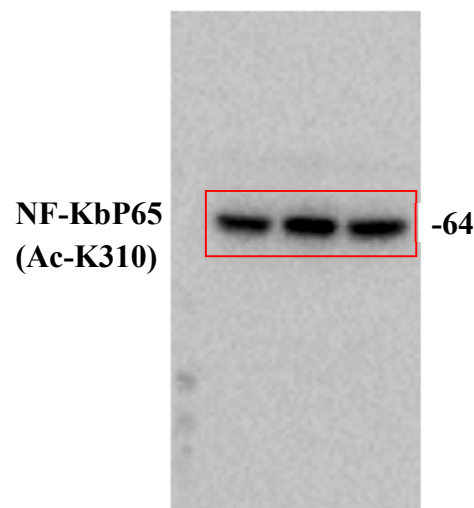

**Fig.4a: GAPDH**

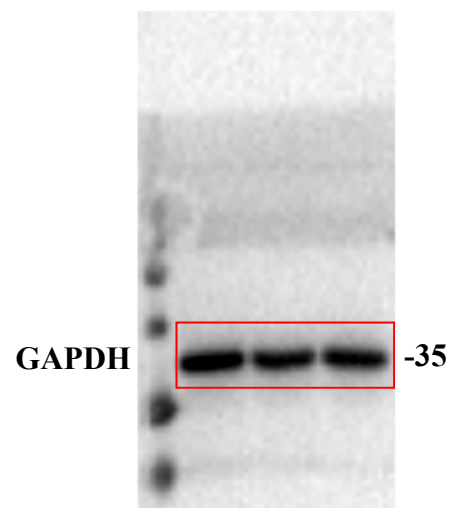

**Supplementary Fig. S7:** Uncropped gels/blots for main Fig.4a. Boxed regions are used in the main figures. For some data, transferred membranes were horizontally cut for applying multiple antibodies. Lanes for unrelated samples are deleted. Lanes from left to right in red box: WT,  $CBS^{+/-}$ ,  $CBS^{+/-}$ +NaHS.

**Full-length blots for Figure 6**

**Fig.6h: OCN**

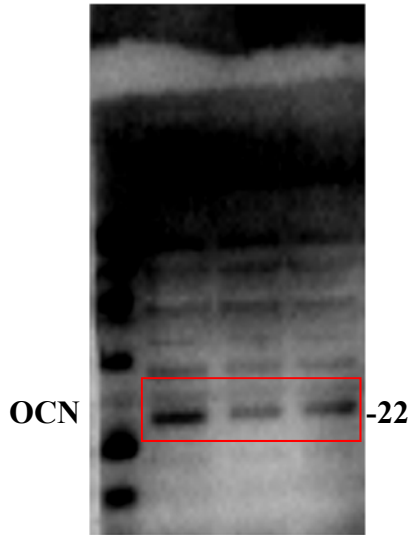

**Fig.6h: RUNX2**

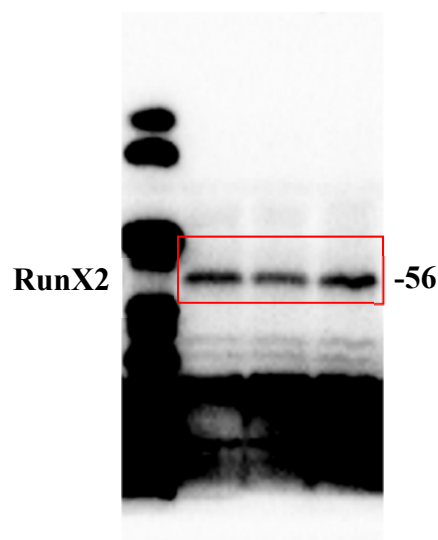

**Fig.6h: GAPDH**

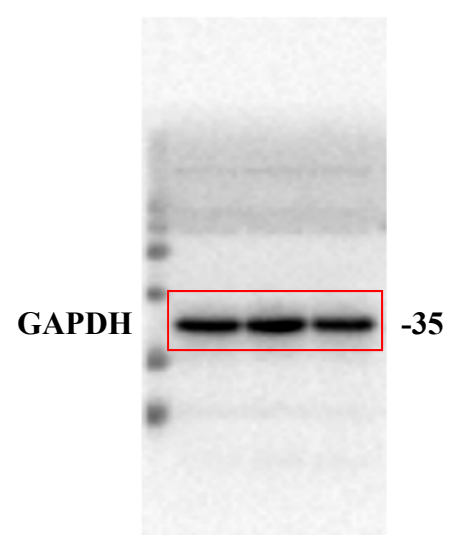

**Supplementary Fig. S8:** Uncropped gels/blots for main Fig.6h. Boxed regions are used in the main figures. For some data, transferred membranes were horizontally cut for applying multiple antibodies. Lanes for unrelated samples are deleted. Lanes from left to right in red box: WT,  $CBS^{+/-}$ ,  $CBS^{+/-}$ +NaHS.

**Full-length blots for Figure 7**

**Fig.7s: SHY-RUNX2**

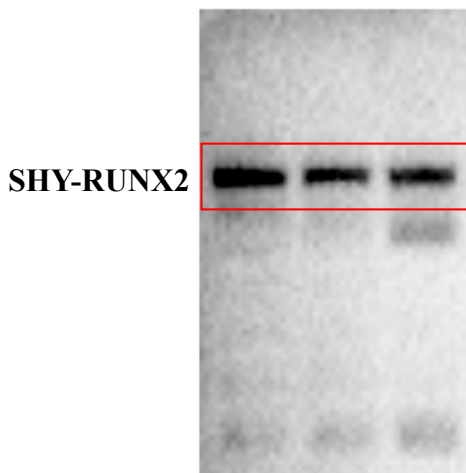

**Fig.7s: Input DNA**

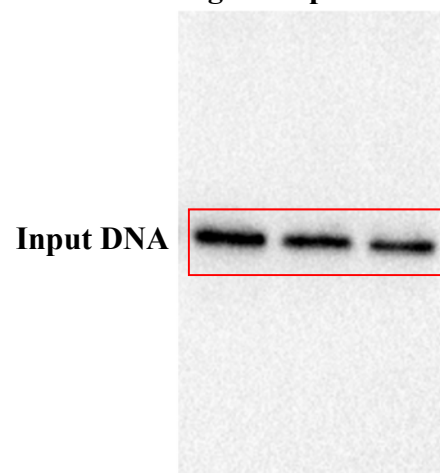

**Supplementary Fig. S9:** Uncropped gels/blots for main Fig.7s. Boxed regions are used in the main figures. For some data, transferred membranes were horizontally cut for applying multiple antibodies. Lanes for unrelated samples are deleted. Lanes from left to right in red box: WT, *CBS*<sup>+/-</sup>, *CBS*<sup>+/-</sup>+NaHS.

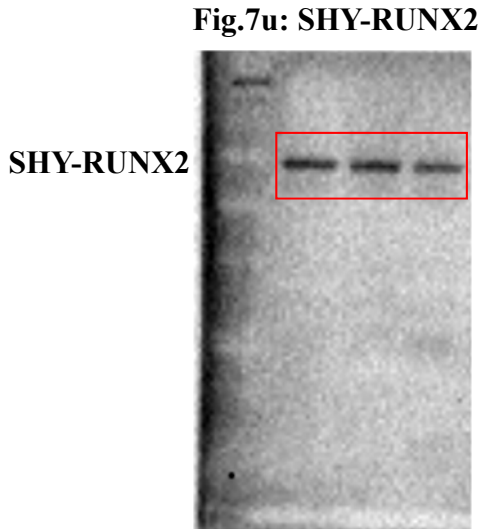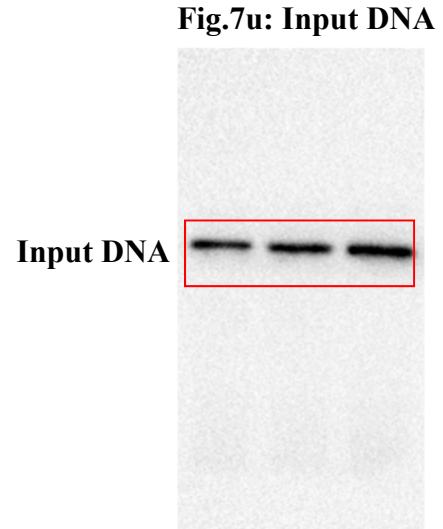

**Supplementary Fig. S10:** Uncropped gels/blots for main Fig.7u. Boxed regions are used in the main figures. For some data, transferred membranes were horizontally cut for applying multiple antibodies. Lanes for unrelated samples are deleted. Lanes from left to right in red box: NaHS, NaHS + DTT, DTT.
